# Supplementary material for: Validation of Rearrangement Break Points Identified by Paired-End Sequencing in Natural Populations of Drosophila melanogaster
Source: PubMed Central journal article supplement — Genome Biol Evol. 2010 Jan 13;2:83–101. doi: 10.1093/gbe/evq001 (PMC2839345; doi:10.1093/gbe/evq001), 2010-01-13
Supplement: evq001_1.pdf [file evq001_1.pdf]

**Supplementary Table 1**

| Event       | Gene        |
|-------------|-------------|
| Class 2 #0  | CG2999      |
| Class 2 #10 | CG31721     |
| Class 2 #11 | CG31757     |
| Class 2 #12 | FBgn0043841 |
| Class 2 #15 | CG17322     |
| Class 2 #15 | CG17323     |
| Class 2 #16 | CG40006     |
| Class 2 #18 | CG17520     |
| Class 2 #18 | CG40452     |
| Class 2 #19 | CG10521     |
| Class 2 #19 | CG10811     |
| Class 2 #19 | CG11049     |
| Class 2 #19 | CG11059     |
| Class 2 #19 | CG11066     |
| Class 2 #19 | CG11081     |
| Class 2 #19 | CG11093     |
| Class 2 #19 | CG11153     |
| Class 2 #19 | CG11163     |
| Class 2 #19 | CG11186     |
| Class 2 #19 | CG12199     |
| Class 2 #19 | CG12840     |
| Class 2 #19 | CG1347      |
| Class 2 #19 | CG14438     |
| Class 2 #19 | CG14476     |
| Class 2 #19 | CG1464      |
| Class 2 #19 | CG1495      |
| Class 2 #19 | CG17018     |
| Class 2 #19 | CG17131     |
| Class 2 #19 | CG1740      |
| Class 2 #19 | CG17484     |
| Class 2 #19 | CG17520     |
| Class 2 #19 | CG17704     |
| Class 2 #19 | CG17947     |
| Class 2 #19 | CG18069     |
| Class 2 #19 | CG18362     |
| Class 2 #19 | CG1981      |
| Class 2 #19 | CG2052      |
| Class 2 #19 | CG2165      |
| Class 2 #19 | CG2201      |
| Class 2 #19 | CG2316      |
| Class 2 #19 | CG2682      |
| Class 2 #19 | CG2944      |
| Class 2 #19 | CG30437     |
| Class 2 #19 | CG30438     |
| Class 2 #19 | CG30440     |

|              |             |
|--------------|-------------|
| Class 2 #19  | CG31000     |
| Class 2 #19  | CG31612     |
| Class 2 #19  | CG31700     |
| Class 2 #19  | CG31703     |
| Class 2 #19  | CG3305      |
| Class 2 #19  | CG33217     |
| Class 2 #19  | CG33521     |
| Class 2 #19  | CG33554     |
| Class 2 #19  | CG33558     |
| Class 2 #19  | CG33653     |
| Class 2 #19  | CG33978     |
| Class 2 #19  | CG3777      |
| Class 2 #19  | CG40129     |
| Class 2 #19  | CG40130     |
| Class 2 #19  | CG40300     |
| Class 2 #19  | CG40452     |
| Class 2 #19  | CG40470     |
| Class 2 #19  | CG40500     |
| Class 2 #19  | CG41435     |
| Class 2 #19  | CG41480     |
| Class 2 #19  | CG41481     |
| Class 2 #19  | CG41516     |
| Class 2 #19  | CG5227      |
| Class 2 #19  | CG5929      |
| Class 2 #19  | CG6448      |
| Class 2 #19  | CG7446      |
| Class 2 #19  | CG7873      |
| Class 2 #19  | CG8663      |
| Class 2 #19  | CG8666      |
| Class 2 #19  | CG8779      |
| Class 2 #19  | CG9256      |
| Class 2 #19  | CG9339      |
| Class 2 #19  | CG9765      |
| Class 2 #19  | FBgn0032960 |
| Class 2 #19  | FBgn0032960 |
| Class 2 #19  | FBgn0032960 |
| Class 2 #19  | FBgn0039916 |
| Class 2 #19  | FBgn0051619 |
| Class 2 #2   | CG31975     |
| Class 2 #2   | CG4648      |
| Class 2 #20  | CG30440     |
| Class 2 #21_ | CG8376      |
| Class 2 #23  | CG2173      |
| Class 2 #23  | R           |
| Class 2 #24  | LvpD        |
| Class 2 #25  | CG8226      |
| Class 2 #25  | CG8230      |

|             |             |
|-------------|-------------|
| Class 2 #25 | Tom7        |
| Class 2 #26 | CG13743     |
| Class 2 #28 | CG8505      |
| Class 2 #29 | CG6016      |
| Class 2 #30 | CG18076     |
| Class 2 #31 | CG15706     |
| Class 2 #31 | CG3666      |
| Class 2 #32 | CG10911     |
| Class 2 #33 | CG14496     |
| Class 2 #34 | CG17921     |
| Class 2 #34 | CG17922     |
| Class 2 #35 | CG1078      |
| Class 2 #35 | CG13499     |
| Class 2 #35 | CG9783      |
| Class 2 #37 | CG3894      |
| Class 2 #37 | Ep          |
| Class 2 #39 | CG2469      |
| Class 2 #39 | CG9153      |
| Class 2 #44 | Aprt        |
| Class 2 #44 | CG13937     |
| Class 2 #45 | CG17723     |
| Class 2 #46 | CG11350     |
| Class 2 #46 | CG7465      |
| Class 2 #5  | CG31955     |
| Class 2 #5  | cutlet      |
| Class 2 #51 | CG9425      |
| Class 2 #51 | NHP2        |
| Class 2 #52 | CG12310     |
| Class 2 #52 | CG13022     |
| Class 2 #52 | CG18581     |
| Class 2 #53 | CG32183     |
| Class 2 #53 | CG6034      |
| Class 2 #54 | CG5577      |
| Class 2 #54 | CG7446      |
| Class 2 #55 | mu          |
| Class 2 #57 | CG1078      |
| Class 2 #57 | CG9783      |
| Class 2 #58 | CG4757      |
| Class 2 #58 | Ugt86Da     |
| Class 2 #58 | Ugt86Dc     |
| Class 2 #59 | CG4210      |
| Class 2 #59 | CG6654      |
| Class 2 #6  | CG7742      |
| Class 2 #61 | FBgn0083954 |
| Class 2 #65 | CG14520     |
| Class 2 #66 | CG11951     |
| Class 2 #66 | SP1029      |

|             |             |
|-------------|-------------|
| Class 2 #67 | CG11504     |
| Class 2 #67 | CG7903      |
| Class 2 #67 | CG7908      |
| Class 2 #68 | CG31524     |
| Class 2 #68 | CG9698      |
| Class 2 #68 | FBgn0039784 |
| Class 2 #68 | FBgn0051524 |
| Class 2 #69 | CG31013     |
| Class 2 #7  | CG13788     |
| Class 2 #7  | Gr28a       |
| Class 2 #7  | Gr28b       |
| Class 2 #72 | crm         |
| Class 2 #74 | CG33223     |
| Class 2 #75 | CG7921      |
| Class 2 #75 | Mgat2       |
| Class 2 #76 | CG33174     |
| Class 2 #78 | CG15056     |
| Class 2 #79 | cactin      |
| Class 2 #79 | CG11710     |
| Class 2 #8  | FBgn0052982 |
| Class 2 #80 | CG9273      |
| Class 2 #80 | CG9342      |
| Class 2 #83 | CG14731     |
| Class 2 #84 | CG33964     |
| Class 2 #84 | Cyp6g1      |
| Class 2 #85 | Cyp6g1      |
| Class 2 #85 | Cyp6g2      |
| Class 2 #9  | FBgn0052982 |
| Class 3 #0  | Cf2         |
| Class 3 #1  | CG33694     |
| Class 3 #1  | CG33695     |
| Class 3 #1  | CG8455      |
| Class 3 #10 | CG17034     |
| Class 3 #10 | Jon99Ci     |
| Class 3 #3  | CG17082     |
